# Supplementary material for: FtsZ induces membrane deformations via torsional stress upon GTP hydrolysis
Source: PubMed Central journal article supplement (PMC8175707; doi:10.1038/s41467-021-23387-3), 2021-06-03
Supplement: 41467_2021_23387_MOESM1_ESM.pdf [file 41467_2021_23387_MOESM1_ESM.pdf]

**FtsZ induces membrane deformations via torsional stress upon GTP hydrolysis.**

**Authors:** Diego A. Ramirez-Diaz<sup>1,2</sup>, Adrian Merino-Salomon<sup>1,3</sup>, Fabian Meyer<sup>4</sup>, Michael Heymann<sup>1,5</sup>, German Rivas<sup>6</sup>, Marc Bramkamp<sup>4</sup> & Petra Schwille<sup>1\*</sup>.

**Supplementary Materials**

**This pdf contains:**

Fig. S1 to S4

Supplementary Table 1-2 (Cloning vectors and primers)

**Fig. S1.**

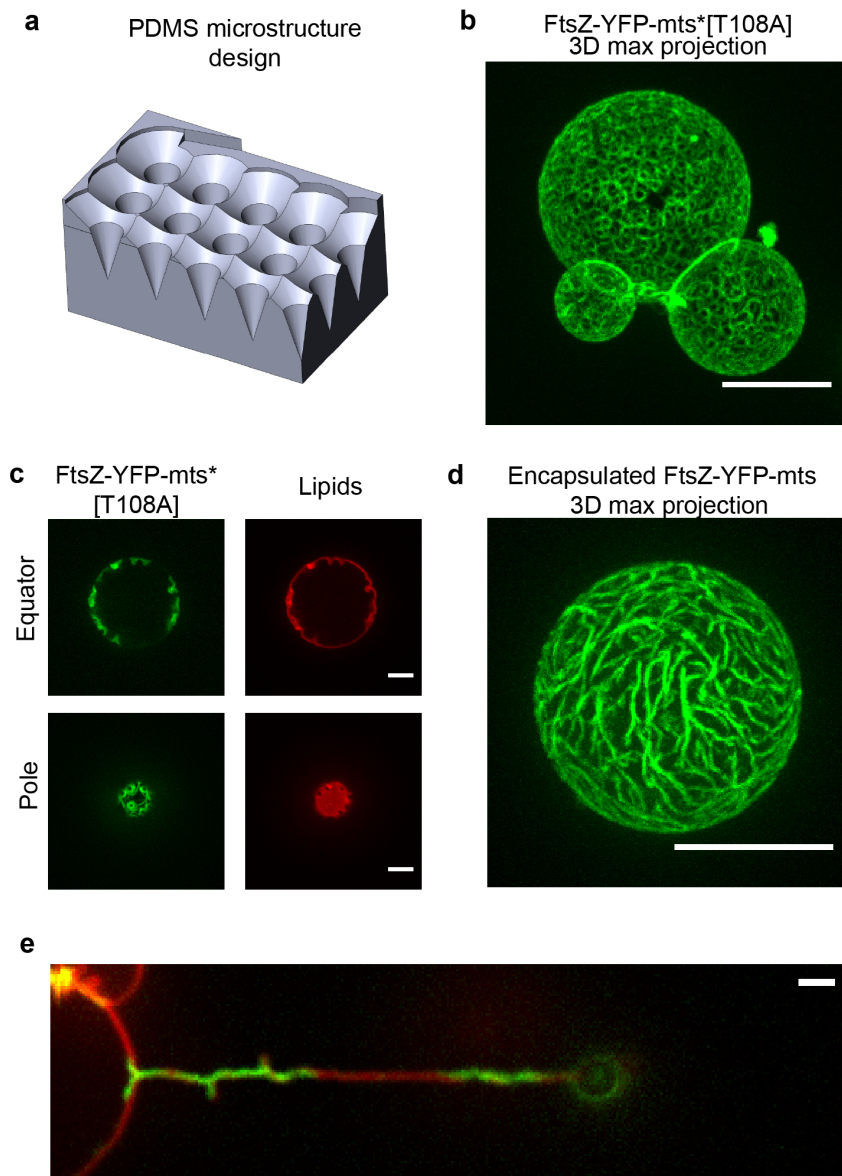

**Design of microstructure, FtsZ-YFP-mts\*[T108A] deformations, high density encapsulated FtsZ-YFP-mts and FtsZ-YFP-mts supercoiling.** a) 3D sketch of the PMDS microstructure with inwards cone-like shapes. b) FtsZ-YFP-mts\*[T108A] also self-assembled into ring-like structures on GUVs (GUVs:N>20) (Scale bar = 10  $\mu$ m). c) After deflation, FtsZ-YFP-mts\*[T108A] induced inwards conical deformations emerging from before mentioned rings (GUVs:N>20) (Scale bar = 2  $\mu$ m). d) By encapsulating FtsZ-YFP-mts in GUVs, Mg<sup>+2</sup> and GTP content-conditions were fine-tuned to obtain either ring structures (Fig. 5) or nematic phases at a higher membrane protein density (GUVs:N>10) (Scale bar = 10  $\mu$ m). e) FtsZ-YFP-

mts torsion over lipid tubes can be found in (less frequent) experiments displaying plectonic/supercoiled regions (N=2). (Scale bar = 2  $\mu\text{m}$ ).

**Fig. S2.**

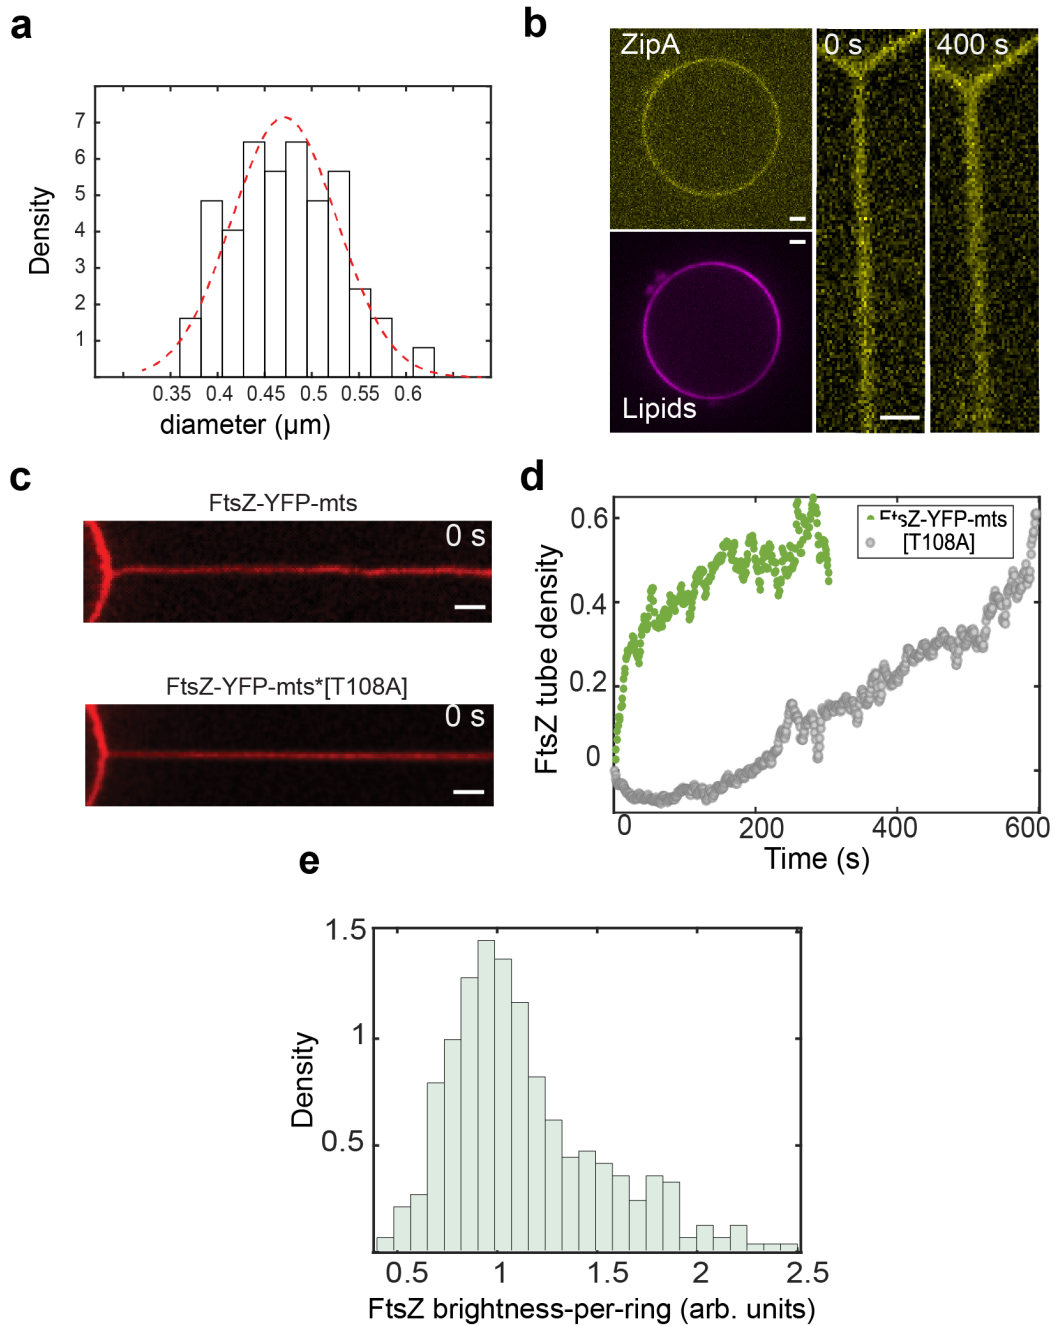

**Tube diameter distribution, ZipA control experiments and ring-unit-brightness distribution.** a) The diameter distribution (N=55) showed a Gaussian distribution with a mean of 0.47  $\mu\text{m}$ . This implied that membrane tensions equivalent to this mean ( $\pm$  std) were highly

frequent despite of precise control on the vesicle membrane tension. b) Vesicles decorated with ZipA and imaged under deflation conditions exhibited no deformations (GUVs:N=14). In addition, we examined lipid tubes only coated with siZipA-Alexa 488. No deformations (N=10) were observed in the range of 400-600 seconds. c) Similar initial lipid tube diameter (0.44  $\mu\text{m}$ ) for experiments shown in Figure 3 a-b d) For experiments shown in Fig. 3 a-b, FtsZ-YFP-*mts* entered rapidly to the lipid tube while the mutant without GTPase activity (slower). e). Distribution of FtsZ brightness-per-ring (N=412 analyzed rings). The distribution's mode value was chosen as the value for FtsZ brightness-per-ring. (Scale bar = 2  $\mu\text{m}$ ).

**Fig. S3.**

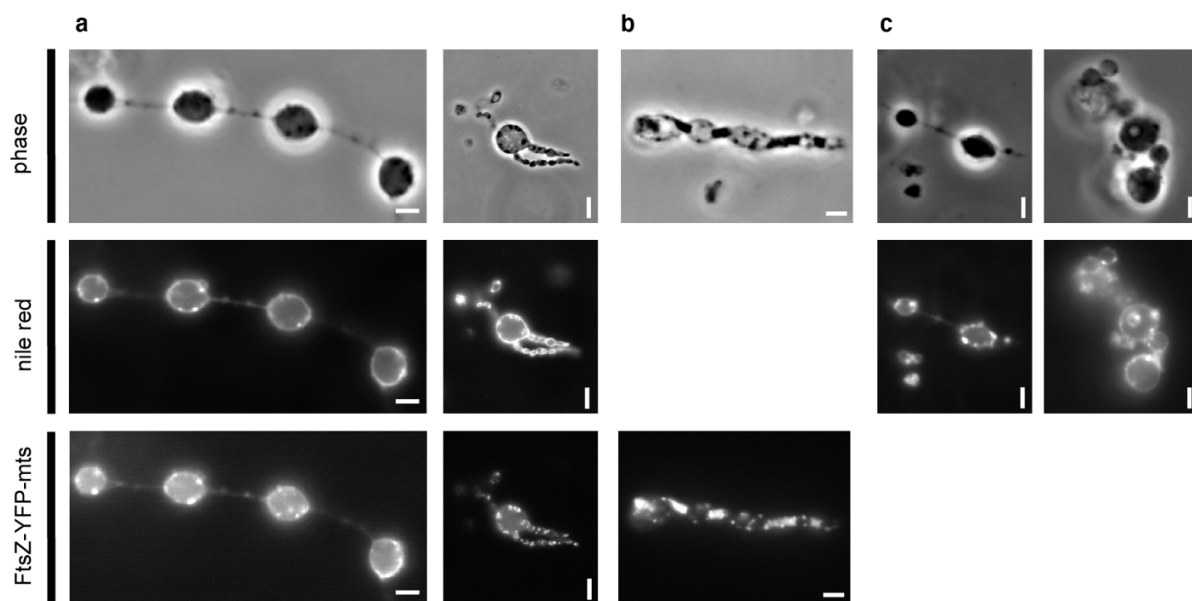

**Observed phenotypes of *E. coli ftsZ-YFP-mts* after lysozyme treatment in sucrose-buffer.**

The first columns in a, b & b show a pearl necklace like appearance of the cells, while the second column in b might show an earlier stage of this chaining type of vesiculation. Nile red was used to prove that the observed vesicles and tubular connections are actually phospholipid-membranes. As a control unstained cells b) and stained cells c) were also imaged separately in

the respective channel. Example micrographs from (N=3) biological replicates. (scale bar = 2 $\mu$ m).

**Fig. S4**

**a**

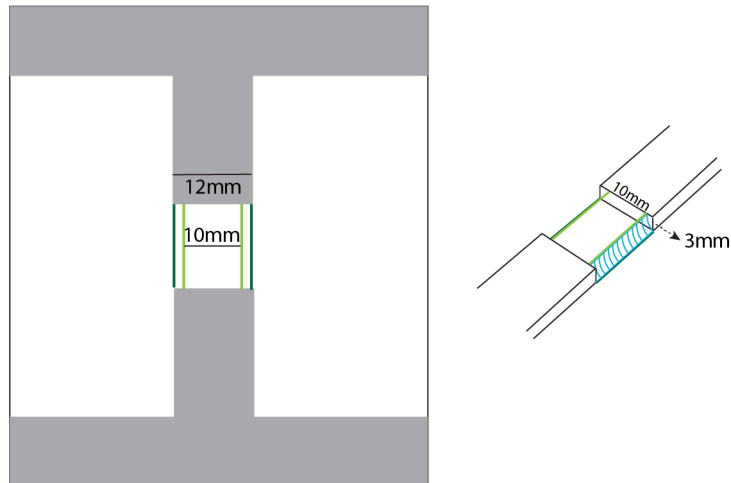

**b**

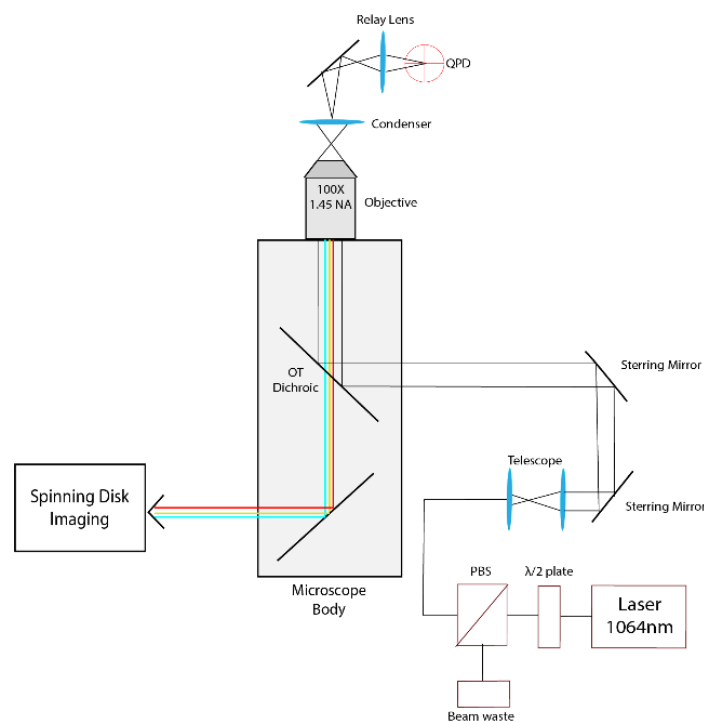

**Drawing for the experiment chamber and optical trapping device a) Sketch of imaging chamber for deflated vesicle preparation. b) Optical tweezers setup layout.**

**Supplementary Table 1: Cloning Vectors**

| <b>Vector</b> | <b>Protein</b>       | <b>Source/reference</b>           |
|---------------|----------------------|-----------------------------------|
| pET-11b       | FtsZ-YFP-mts         | gifted by Harold Erickson, Ref. 1 |
| pET-11b       | FtsZ-YFP-mts*[T108A] | Ref. 3                            |
| pET-28a       | FtsZ-WT              | Ref. 31                           |
| pET-15ZIP     | sZipA                | Ref. 32                           |
| pEKEx2        | FtsZ-YFP-mts         | This publication                  |

**Supplementary Table 2: Primers**

| <b>Name</b> | <b>Sequence 5' – 3'</b>            |
|-------------|------------------------------------|
| T108A_RV    | GGTGGTGGTGCCGGTACAGGT              |
| T108A_FW    | ACCTGTACCGGCACCACCACC              |
| sZipAI      | CATATGGCTGCCGCGCG                  |
| sZipAII     | ACCAGCCGTAAAGAACG                  |
| Sall-ftsZ   | CATGTCGACATGTTTGAACCAATGGA ACTTACC |
| SacI-mts    | CATGAGCTCTTATCCTCCGAACAAGCG        |
